# Supplementary material for: Trehalose-Induced Regulations in Nutrient Status and Secondary Metabolites of Drought-Stressed Sunflower (Helianthus annuus L.) Plants
Source: MDPI journal article supplement (doi:10.3390/plants11202780), 2022-10-20
Supplement: s1 [file s1]

**Table S1: Correlations coefficients (*r*) among different growth, yield and biochemical attributes of drought-stressed sunflower (*Helianthus annuus* L.) plants treated with trehalose as a foliar spray.**

| Parameters                    | Shoot length | Root length | RMP    | RWC    | AsA    | TSP    | TSS    | RS     | NRS    | H <sub>2</sub> O <sub>2</sub> | MDA    | T. Phenolics | SOD    | POD    | CAT    | Achene yield |
|-------------------------------|--------------|-------------|--------|--------|--------|--------|--------|--------|--------|-------------------------------|--------|--------------|--------|--------|--------|--------------|
| Shoot length                  |              | 0.62*       | -0.384 | 0.621* | -0.320 | 0.524* | -0.267 | -0.253 | -0.122 | -0.45                         | -0.371 | -0.071       | -0.316 | -0.258 | -0.263 | 0.722**      |
| Root length                   |              |             | -0.572 | 0.284  | -0.022 | 0.485  | -0.050 | -0.113 | 0.044  | -0.446                        | -0.450 | -0.271       | -0.290 | -0.390 | -0.290 | 0.744**      |
| RMP                           |              |             |        | -0.147 | -0.271 | -0.280 | -0.064 | 0.126  | -0.130 | 0.141                         | 0.261  | 0.057        | 0.085  | 0.289  | -0.006 | -0.426       |
| RWC                           |              |             |        |        | -0.300 | 0.419  | -0.145 | -0.172 | -0.028 | -0.353                        | -0.254 | -0.110       | -0.233 | -0.02  | -0.113 | 0.523*       |
| AsA                           |              |             |        |        |        | -0.155 | 0.402  | 0.358  | 0.171  | 0.010                         | -0.126 | 0.075        | 0.269  | -0.060 | 0.302  | -0.142       |
| TSP                           |              |             |        |        |        |        | -0.085 | -0.148 | 0.014  | -0.358                        | -0.274 | 0.012        | -0.315 | -0.013 | -0.122 | 0.485*       |
| TSS                           |              |             |        |        |        |        |        | 0.409  | 0.81** | 0.223                         | 0.079  | 0.145        | 0.208  | -0.041 | 0.360  | -0.164       |
| RS                            |              |             |        |        |        |        |        |        | -0.175 | 0.069                         | -0.051 | 0.241        | 0.292  | 0.204  | 0.206  | -0.208       |
| NRS                           |              |             |        |        |        |        |        |        |        | 0.208                         | 0.114  | -0.02        | 0.052  | -0.177 | 0.250  | -0.040       |
| H <sub>2</sub> O <sub>2</sub> |              |             |        |        |        |        |        |        |        |                               | 0.379  | 0.123        | 0.316  | 0.209  | 0.188  | -0.516       |
| MDA                           |              |             |        |        |        |        |        |        |        |                               |        | 0.378        | 0.117  | 0.223  | 0.189  | -0.552       |
| T. Phenolics                  |              |             |        |        |        |        |        |        |        |                               |        |              | 0.271  | 0.304  | 0.371  | -0.189       |
| SOD                           |              |             |        |        |        |        |        |        |        |                               |        |              |        | 0.434  | 0.384  | -0.262       |
| POD                           |              |             |        |        |        |        |        |        |        |                               |        |              |        |        | 0.360  | -0.331       |
| CAT                           |              |             |        |        |        |        |        |        |        |                               |        |              |        |        |        | -0.293       |
| Achene yield                  |              |             |        |        |        |        |        |        |        |                               |        |              |        |        |        |              |

**Abbreviations:** RMP, relative membrane permeability; RWC, relative water content; MDA, malondialdehyde; H<sub>2</sub>O<sub>2</sub>, hydrogen peroxide; T. Phenolics, total phenolics; AsA, ascorbic acid; CAT, catalase; POD, peroxidase; SOD, superoxide dismutase; TSS, total soluble sugars; RS, reducing sugars; NRS, non-reducing sugars; TSP, total soluble proteins; Achene yield/plant; \*, \*\*, significant at 0.05 and 0.01 levels; ns, no significant.
